# Supplementary material
Source: Royal Society of Chemistry journal article supplement (doi:10.1039/d6nj01060a)
Supplement: d6nj01060a1.pdf [file d6nj01060a1.pdf]

## **Enhanced Structural Stability and Selective Furfural Hydrogenation over Ru and Si co-doped SrFeO<sub>3-δ</sub> Perovskite**

**Meloth Bhavisha,<sup>a</sup> Arsha P. Joseph,<sup>a</sup> Chinnakonda S. Gopinath,<sup>b,c</sup> Sarkarainadar  
Balamurugan,<sup>d</sup> Naragalu J. Venkatesha,<sup>e</sup> Venkatachalam Ganesh<sup>f</sup> and Ayyamperumal  
Sakthivel<sup>a\*</sup>**

<sup>a</sup>Inorganic Materials & Heterogeneous Catalysis Laboratory, Department of Chemistry,  
School of Physical Sciences, Sabarmati Building, Tejaswini Hills, Central University of  
Kerala, Kasaragod - 671320, India

<sup>b</sup>Catalysis and Inorganic Chemistry Division, CSIR - National Chemical Laboratory, Dr  
Homi Bhabha Road, Pune 411 008, India.

<sup>c</sup>Department of Chemistry, Indian Institute of Technology, Palakkad 678623, India

<sup>d</sup>Advanced Nanomaterials Research Laboratory, Department of Nanotechnology, Noorul  
Islam Centre for Higher Education, Thuckalay, 629180, India

<sup>e</sup>Department of Chemistry, Bangalore Institute of Technology, Bangalore, 560004, India

<sup>f</sup>Electrodeics and Electrocatalysis (EEC) Division, CSIR – Central Electrochemical Research  
Institute (CSIR – CECRI), Karaikudi – 630003, Tamilnadu, India.

† Email: [sakthivelcuk@cukerala.ac.in/sakthiveldu@gmail.com](mailto:sakthivelcuk@cukerala.ac.in/sakthiveldu@gmail.com)

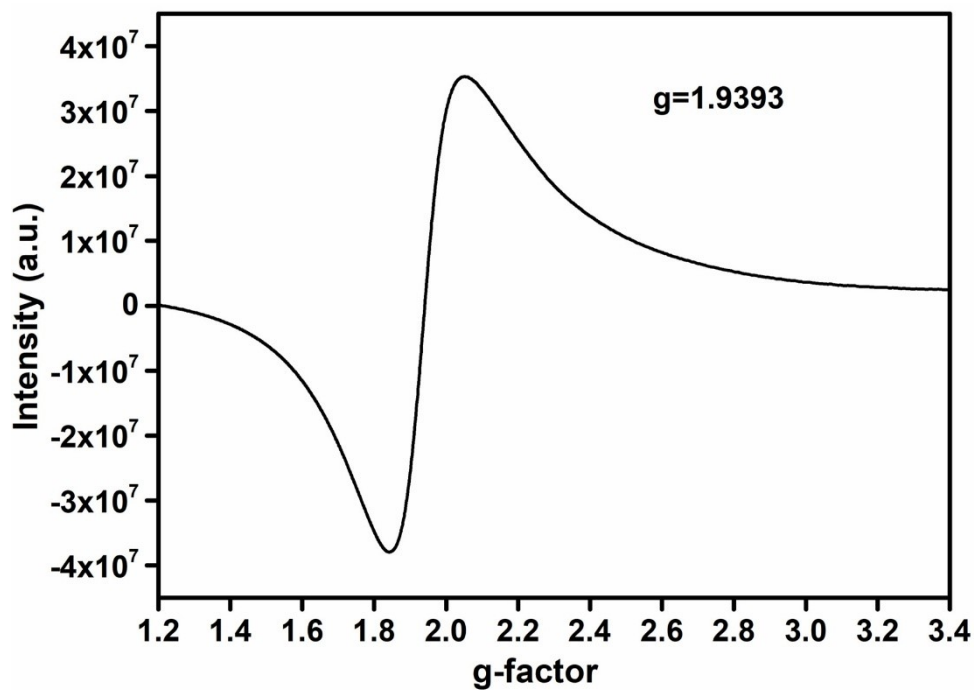

Fig. S1 EPR spectrum of SFRS sample.

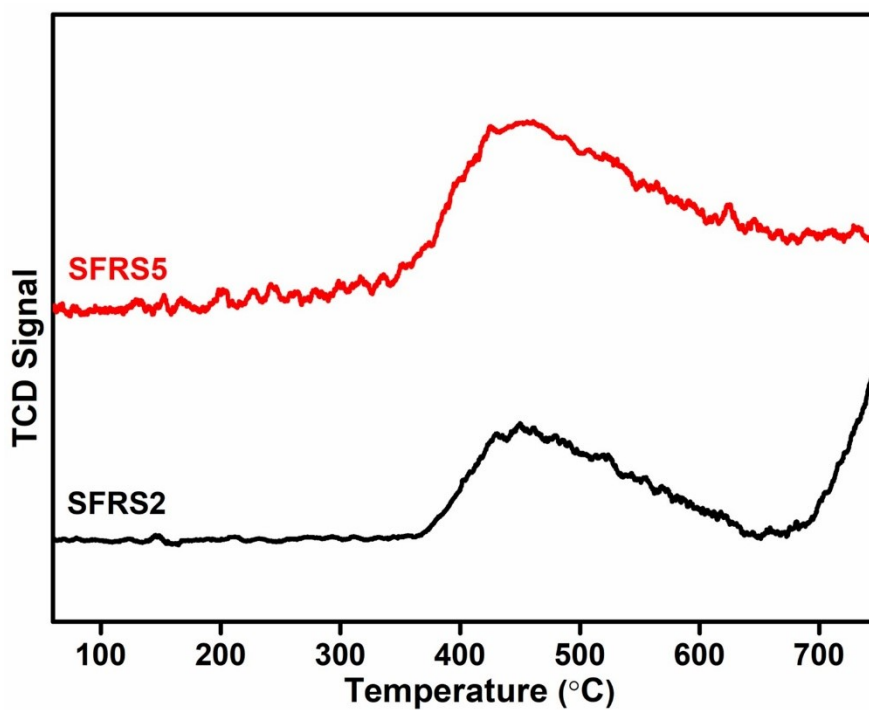

Fig. S2 TPD-  $O_2$  profile of SFRS2 and SFRS5.

**Table S1:** Furfural hydrogenation over Ru based catalyst under optimum reaction

| Sl.No. | Catalyst                          | Conversion (%) | Selectivity (%) |       |      |                             |
|--------|-----------------------------------|----------------|-----------------|-------|------|-----------------------------|
|        |                                   |                | FAL             | THFOL | 2-MF | Other products <sup>b</sup> |
| 1      | Ru/Al <sub>2</sub> O <sub>3</sub> | 100            | 1.0             | 60.7  | -    | 38.3                        |
| 2      | Ru/SiO <sub>2</sub>               | 100            | 1.3             | 59.8  | -    | 38.9                        |
| 3      | Ru/C                              | 100            | 1.6             | 54.4  | 7.1  | 36.9                        |

conditions.<sup>a</sup>

<sup>a</sup> Reaction conditions: Furfural = 2 mmol, Solvent (*iso*-propanol) = 2mL, H<sub>2</sub> pressure = 30 bar, Temperature=185 °C and Reaction time = 6 h.

<sup>b</sup> It include butanol, furfuryl isopropyl ether and other unidentified products.

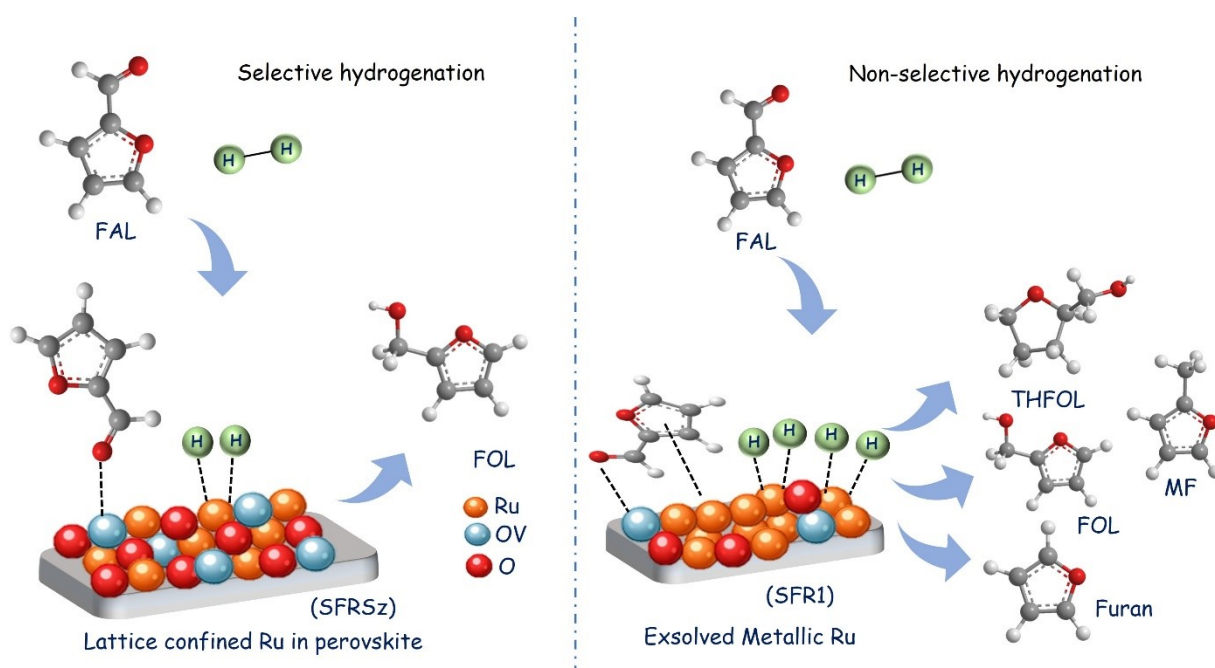**Fig. S3:** The plausible reaction mechanism on furfural hydrogenation over SFRS<sub>z</sub> and SFR catalysts.

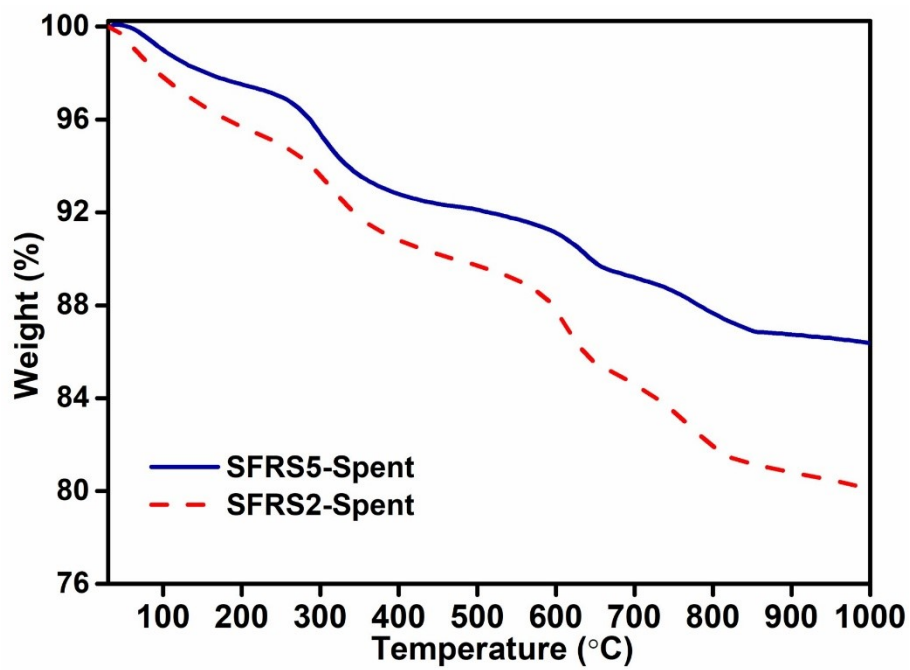

**Fig. S4** TGA profile of spent SFRS2 and SFRS5 catalysts in air atmosphere.
